# Supplementary material
Source: publisher figshare collection journal article supplement (https://gsajournals.figshare.com/articles/dataset/_/16695040)
Supplement: Supplementary file 1 [file 1]

SUPPLEMENTAL RESULTS FOR BECKMAN, MARTINS ET AL.

**Table of Contents**

| <b>Title:</b>                                                                                                                                                  | <b>Page</b> |
|----------------------------------------------------------------------------------------------------------------------------------------------------------------|-------------|
| TABLE S1. Pairwise global Fst of <i>M. m. domesticus</i> populations on northern transect.                                                                     | 3           |
| TABLE S2. Pairwise global Fst of <i>M. m. domesticus</i> populations on southern transect.                                                                     | 4           |
| TABLE S3. Variant effect predictor results for autosomal SNPs.                                                                                                 | 5           |
| TABLE S4. Ancestral vs derived state of major allele at candidate SNPs at highest elevation for northern and southern transects.                               | 6           |
| TABLE S5. Ancestral vs derived state of major allele at candidate SNPs at highest elevation for northern and southern transects for X chromosome.              | 7           |
| TABLE S6. Permutation tests for overlap of autosomal unique gene regions from selection scans for northern and southern transects of <i>M. m. domesticus</i> . | 8           |
| TABLE S7. Summary information on candidate regions present three or more selection scans on northern and southern transects.                                   | 9           |
| TABLE S8. Permutation test results for autosomal SNP overlap.                                                                                                  | 11          |
| TABLE S9. Permutation tests for overlap of unique gene regions on X chromosome from selection scans for northern and southern <i>M. m. domesticus</i> .        | 12          |
| TABLE S10. Permutation tests for overlap SNPs on X chromosome from selection scans for northern and southern <i>M. m. domesticus</i> .                         | 13          |
| Figure S1. Unrooted maximum likelihood tree of South American <i>M. m. domesticus</i> .                                                                        | 14          |
| Figure S2. Principal component analysis of northern and southern transects individuals.                                                                        | 15          |
| Figure S3. Shared and unique variable sites for high and low populations.                                                                                      | 16          |

|    |                                                                                                        |    |
|----|--------------------------------------------------------------------------------------------------------|----|
| 25 | Figure S4. Admixture analyses <i>M. m. domesticus</i> .                                                | 17 |
| 26 | Figure S5. <i>M. m. domesticus</i> pairwise genetic differentiation ( $F_{ST}$ ) across space.         | 18 |
| 27 | Figure S6. Tract length of consecutive significant SNPs in <i>M. m. domesticus</i> selection scans.    | 19 |
| 28 | Figure S7. Distribution of the difference in nucleotide diversity ( $\pi$ ) between high               |    |
| 29 | and low populations.                                                                                   | 20 |
| 30 | Figure S8. Northern <i>M. m. domesticus</i> autosomal selection scan results and nucleotide diversity. | 21 |
| 31 | Figure S9. Southern transect <i>M. m. domesticus</i> autosomal selection scan results and              |    |
| 32 | nucleotide diversity.                                                                                  | 22 |
| 33 | Figure S10. Transect gene overlap of selection scan candidates on X chromosome.                        | 23 |

34 TABLE S1. Pairwise global  $F_{st}$  of *M. m. domesticus* populations on northern transect.

|             | n  | ≤ 330 m  | 320–500 m | 1300–1900 m | 2300–2700 m |
|-------------|----|----------|-----------|-------------|-------------|
| ≤ 330 m     | 10 | ---      | ---       | ---         | ---         |
| 320–500 m   | 10 | 0.106143 | ---       | ---         | ---         |
| 1300–1900 m | 9  | 0.217272 | 0.204177  | ---         | ---         |
| 2300–2700 m | 10 | 0.246651 | 0.241443  | 0.100608    | ---         |
| 2800–3100 m | 10 | 0.222268 | 0.222668  | 0.108947    | 0.05484     |

35

36 **TABLE S2. Pairwise global  $F_{st}$  of *M. m. domesticus* populations on southern transect.**

|                    | <b>n</b> | <b>≤ 90 m</b> | <b>200–500 m</b> | <b>2500–2900 m</b> | <b>3000–3699 m</b> |
|--------------------|----------|---------------|------------------|--------------------|--------------------|
| <b>≤ 90 m</b>      | 9        | ---           | ---              | ---                | ---                |
| <b>200–500 m</b>   | 6        | 0.205655      | ---              | ---                | ---                |
| <b>2500–2900 m</b> | 12       | 0.213042      | 0.146307         | ---                | ---                |
| <b>3000–3699 m</b> | 10       | 0.263718      | 0.277857         | 0.178009           | ---                |
| <b>3700–3900 m</b> | 8        | 0.264726      | 0.279593         | 0.204191           | 0.083971           |

37

38 **TABLE S3. Variant effect predictor results for autosomal SNPs<sup>a</sup>.**

|                     | northern transect |          |          |          |          | southern transect |          |          |          |          |
|---------------------|-------------------|----------|----------|----------|----------|-------------------|----------|----------|----------|----------|
|                     | Total             | LFMM     | LFMM     | PBSn1    | PBSn1    | Total             | LFMM     | LFMM     | PBSn1    | PBSn1    |
|                     |                   | q=0.05   | q=0.01   | top 1%   | top 0.1% |                   | q=0.05   | q=0.01   | top 1%   | top 0.1% |
| <b>Nonsynon.</b>    | 9.094             | 9.16     | 9.28     | 10.50    | 12.60    | 7.56              | 10.61*** | 11.75*** | 10.51*** | 10.84    |
| <b>3' or 5' UTR</b> | 25.68             | 26.16    | 24.22    | 26.74    | 22.83    | 19.65             | 23.27**  | 25.28**  | 24.59*** | 28.92**  |
| <b>Synonym.</b>     | 15.35             | 18.82*** | 19.76*** | 18.86*** | 26.77**  | 12.24             | 13.34    | 11.53    | 15.45*** | 15.66    |
| <b>Other</b>        | 49.88             | 45.82*** | 46.74    | 43.86*** | 37.8**   | 60.55             | 52.77*** | 51.44*** | 49.45*** | 44.58*** |

39 <sup>a</sup>. Results expressed as percentage of total. Ranks correspond to nonsynonymous variant, 3' or 5' UTR variant,  
40 synonymous mutation, and other variants including intronic, intergenic, splice variants, SNPs in flanking regions,  
41 noncoding variants. \*\* p-value ≤ 0.01, \*\*\* p-value ≤ 0.001. P values are based on bootstrapping in which the  
42 observed number of candidate SNPs were chosen from the total set of SNPs. This was repeated 1000 times, and  
43 the variant effect of each SNP was calculated. Observed proportions were then compared to the proportions  
44 observed in the bootstrapped data.

TABLE S4. Ancestral vs derived state of major allele at candidate SNPs<sup>a</sup> at highest elevation for northern and southern transects.

|              | <u>LFMM</u>     |         |                 |         | <u>PBSn1</u>  |         |                 |         |
|--------------|-----------------|---------|-----------------|---------|---------------|---------|-----------------|---------|
|              | <u>q = 0.05</u> |         | <u>q = 0.01</u> |         | <u>top 1%</u> |         | <u>top 0.1%</u> |         |
|              | Ancestral       | Derived | Ancestral       | Derived | Ancestral     | Derived | Ancestral       | Derived |
| <b>north</b> | 144             | 379***  | 66              | 186***  | 145           | 474***  | 22              | 60***   |
| <b>south</b> | 145             | 141     | 63              | 62      | 254           | 517***  | 21              | 62***   |

<sup>a</sup>. Most significant SNP per gene only included. Significant dependence between elevation and ancestral vs derived state indicated by \*\*\* ( $p \leq 0.001$ ).

49 **TABLE S5. Ancestral vs derived state of major allele at candidate SNPs<sup>a</sup> at highest elevation for northern and**  
 50 **southern transects for X chromosome.**

|              | <u>LFMM <math>q = 0.05</math></u> |         | <u>PBSn1 top 1%</u> |         |
|--------------|-----------------------------------|---------|---------------------|---------|
|              | Ancestral                         | Derived | Ancestral           | Derived |
| <b>North</b> | 5                                 | 6       | 1                   | 8**     |
| <b>South</b> | 54**                              | 33      | 4                   | 7       |

51 <sup>a</sup>. Most significant SNP per gene only included. Significant dependence between elevation and ancestral vs derived  
 52 state indicated by \*\* ( $p \leq 0.01$ ).

TABLE S6. Permutation tests<sup>a</sup> for overlap of autosomal unique gene regions from selection scans for northern and southern transects of *M. m. domesticus*.

|                | Unique regions<br>northern transect | Unique regions<br>southern transect | Overlap | Expected<br>overlap | P-value       | Z-score |
|----------------|-------------------------------------|-------------------------------------|---------|---------------------|---------------|---------|
| LFMM q=0.05    | 624                                 | 329                                 | 17      | 15                  | 0.3377        | 0.5437  |
| LFMM q=0.01    | 304                                 | 134                                 | 1       | 3                   | 0.9520        | -1.183  |
| PBSn1 top 5%   | 2125                                | 2607                                | 655     | 438                 | <b>0.0010</b> | 12.317  |
| PBSn1 top 1%   | 586                                 | 699                                 | 71      | 32.5                | <b>0.0010</b> | 7.511   |
| PBSn1 top 0.5% | 311                                 | 378                                 | 22      | 9.3                 | <b>0.0010</b> | 4.7445  |
| PBSn1 top 0.1% | 80                                  | 80                                  | 0       | 0.5                 | 1             | -0.6891 |

<sup>a</sup>. Restricted to genomic regions sampled on both transects. Significant p-values in **bold**.



56 **TABLE S7. Summary information<sup>a</sup> on candidate regions present three or more selection scans<sup>b</sup> on northern and**  
 57 **southern transects.**

| Gene     | Position     | North |                   |                    | South |                   |                    | Combined |                     | Summary of function                                                                                           |
|----------|--------------|-------|-------------------|--------------------|-------|-------------------|--------------------|----------|---------------------|---------------------------------------------------------------------------------------------------------------|
|          |              | LFMM  | PBS <sub>n1</sub> | Pi <sub>diff</sub> | LFMM  | PBS <sub>n1</sub> | Pi <sub>diff</sub> | LFMM     | Tissue <sup>a</sup> |                                                                                                               |
| PPP1R42  | 1:9968624    | -     | X                 | -                  | X**   | X**               | -                  | -        | MS                  | Cytoskeleton binding activity                                                                                 |
| CHRNA2   | 1:87190607   | X     | -                 | -                  | X**   | X                 | -                  | X        | MS, N               | Neurotransmitter binding activity at neuromuscular junction                                                   |
| RBM44    | 1:91145089   | X     | X                 | -                  | -     | X**               | -                  | -        | GU                  | Homodimerization; impacts male germ cell morphology                                                           |
| TRAF3IP1 | 1:91494647   | X**   | X                 | -                  | -     | X                 | -                  | X        | I, ED               | Cytoskeleton binding and signal receptor binding;<br>Impacts organ development and interferon-beta production |
| CNTNAP5B | 1:99772765   | -     | X                 | X                  | X**   | X                 | X                  | -        | N                   | Cell adhesion                                                                                                 |
| ITIH5    | 2:10153571   | X     | X**               | X                  | -     | X                 | -                  | X        | -                   | Component of collagen-containing extracellular matrix                                                         |
| KIF5C    | 2:49619298   | -     | X                 | -                  | X**   | X                 | -                  | -        | N                   | Motor neuron axon guidance;<br>Apolipoprotein receptor binding activity                                       |
| CDH4     | 2:179442431  | X**   | X                 | -                  | -     | X                 | -                  | -        | N, R                | Cell adhesion; Neuron generation                                                                              |
| HADH     | 3:131233419  | -     | X                 | -                  | X     | X                 | -                  | X        | MET                 | Positive regulation of cold-induced thermogenesis;<br>Protein-protein interaction with Itga2                  |
| CSMD2    | 4:127987857  | X**   | X                 | -                  | X     | -                 | -                  | -        | N                   |                                                                                                               |
| KDM1A    | 4:136550540  | X     | X                 | -                  | -     | X                 | -                  | -        | C                   | Chromatin binding activity;<br>Involved in primitive erythrocyte differentiation                              |
| PERM1    | 4:156215868  | -     | X                 | -                  | X     | X**               | -                  | -        | MS                  | Regulation of transcription                                                                                   |
| PRKAG2   | 5:24862744   | -     | X                 | -                  | X     | X                 | -                  | X        | C, MET              | Lipid metabolism and signal transduction<br>Apelin signaling pathway                                          |
| TGFBR3   | 5:107106570  | X**   | X                 | -                  | -     | X                 | -                  | -        | C                   | Angiogenesis; blood vessel and heart development;<br>Protein-protein interaction with Tgfr2                   |
| CTTNBP2  | 6:18366478   | X     | X                 | -                  | -     | X                 | -                  | -        | N                   | Cytoskeleton organization in glutamatergic synapse                                                            |
| CTU1     | 7:43672016   | X     | X                 | -                  | -     | X                 | -                  | X        | -                   | tRNA binding activity; localized at mitochondrion                                                             |
| KNDC1    | 7:139894696  | X     | -                 | -                  | X     | X**               | -                  | X        | N                   | Dendrite morphogenesis                                                                                        |
| B4GALNT4 | 7:141061104  | X     | X                 | -                  | -     | X                 | -                  | X        | -                   | Transferase activity associated with Golgi apparatus                                                          |
| PKP3     | 7:141078229  | X     | X                 | -                  | -     | X**               | -                  | X        | S                   | Keratinization, null allele impacts hair follicle                                                             |
| MUC5AC   | 7:141788972  | X     | X                 | -                  | -     | X                 | -                  | X        | O, R                | Maintenance of lens transparency                                                                              |
| COG2     | 8:124520767  | X**   | X**               | X                  | X     | -                 | -                  | X        | GU                  | Golgi organization and transport                                                                              |
| SRGAP1   | 10:121780991 | X**   | X                 | -                  | X     | X                 | -                  | -        | N                   | Signal transduction and cell migration                                                                        |

|          |              |     |     |   |     |     |   |   |         |                                                                                                                         |
|----------|--------------|-----|-----|---|-----|-----|---|---|---------|-------------------------------------------------------------------------------------------------------------------------|
| SH3PXD2B | 11:32347820  | X   | X   | - | X** | X   | - | X | C, MS   | Essential to organ development and osteoblast fate; null allele                                                         |
|          |              |     |     |   |     |     |   |   | N, O    | mutants have severe skeletal and cardiac defects                                                                        |
| ANKFN1   | 11:89390092  | -   | X   | X | X** | X** | - | X | B       | Involved in behavioral fear response, balance, locomotion.                                                              |
| DHX58    | 11:100694884 | X   | X   | - | -   | X** | - | - | I, N    | Involved in innate immune response and response to virus                                                                |
| STAT5B   | 11:100780731 | -   | X   | - | X   | X   | - | - | ED, I   | Involved in organ development, cell surface receptor signaling pathway and lymphocyte activation                        |
| CCDC103  | 11:102881224 | -   | X   | - | X** | X   | - | - | -       | Critical in determinization of left/right symmetry                                                                      |
| SYT16    | 12:73997624  | X   | X   | X | -   | X   | - | X | N       | Integral component of membrane; involved in exocytosis                                                                  |
| DNAH11   | 12:117877982 | X** | X   | - | -   | X   | - | X | -       | Critical in determinization of left/right symmetry                                                                      |
| NALCN    | 14:123276634 | X   | -   | - | X   | X   | - | X | N       | Cation transmembrane transport;<br>Regulation of resting membrane potential                                             |
| ITGBL1   | 14:123659971 | X** | -   | - | X** | X   | - | X | C, MS   | Involved in cell adhesion, cell-matrix adhesion                                                                         |
|          |              |     |     |   |     |     |   |   | N       | Integrin-mediated signaling pathway<br>Colocalizes with Mmp2                                                            |
| FGF14    | 14:123977907 | X** | X   | - | X   | X   | - | X | C, N, R | Growth factor activity that includes heparin binding activity;<br>Involved in cardiac conduction and muscle contraction |
| COL22A1  | 15:71795795  | X** | X   | X | X   | X   | - | - | C, N    | Component of extracellular matrix organization,<br>Key to collagen formation and angiogenesis                           |
| MROH5    | 15:73786936  | X   | X   | - | X   | X   | - | - | -       | ---                                                                                                                     |
| MYOM1    | 17:71003332  | X   | -   | - | X   | X** | - | X | MS      | Involved in muscle contraction, exhibits homodimerization                                                               |
| PPP1R21  | 17:88530124  | X** | X   | - | -   | X   | - | X | N       | Impacts early embryo development                                                                                        |
| STON1    | 17:88597615  | X** | X   | - | X   | X   | - | X | GU      | Involved in cell adhesion, cellular signaling and cell migration                                                        |
| GTF2A1L  | 17:88668660  | X** | X   | - | -   | X   | - | X | ED      | Transcription factor active in early embryo                                                                             |
| LHCGR    | 17:88716481  | X** | X** | - | -   | X   | - | X | ED      | Hormone receptor activity; impacts reproductive system                                                                  |
| PUM3     | 19:27388698  | X** | X** | - | -   | X   | - | X | -       | Regulation of translation through mRNA binding                                                                          |
| ENO4     | 19:58943425  | X** | X   | - | -   | X   | - | X | GU      | Involved in cilium organization; impacts sperm motility                                                                 |

<sup>a</sup>. N: Nervous system, MS: musculoskeletal, I: immune, R: respiratory, MET: metabolism, C: cardiovascular, GU:

geniurinary, ED: Embryo development, O: ocular, B: BEHAVIOR, S: SKIN

<sup>b</sup> X indicates significance value of  $q \leq 0.05$  for LFMM, top 1% for *PBSn1* and top 1 percent for  $\pi_{diff}$ . \*\* indicates a

significance value of  $q \leq 0.01$  for LFMM or the top 0.1% of *PBSn1* values.

62 TABLE S8. Permutation test<sup>a</sup> results for autosomal SNP overlap.

|                       | Unique SNPs       | Unique SNPs       | overlap | Expected | P-value | Z-score  |
|-----------------------|-------------------|-------------------|---------|----------|---------|----------|
|                       | northern transect | southern transect |         | overlap  |         |          |
| <b>LFMM q=0.05</b>    | 1787              | 944               | 1       | 123      | 1       | -3.9759  |
| <b>LFMM q=0.01</b>    | 809               | 400               | 0       | 24       | 1       | -1.5541  |
| <b>PBSn1 top 5%</b>   | 6034              | 8451              | 598     | 4033     | 1       | -26.3044 |
| <b>PBSn1 top 1%</b>   | 1171              | 1688              | 38      | 157.4    | 1       | -4.576   |
| <b>PBSn1 top 0.5%</b> | 564               | 841               | 10      | 38.5     | 0.996   | -2.0611  |
| <b>PBSn1 top 0.1%</b> | 124               | 156               | 0       | 1.5      | 1       | -0.6919  |

63 <sup>a</sup>. Restricted to genomic regions sampled on both transects.

64 **TABLE S9. Permutation tests<sup>a</sup> for overlap of unique gene regions on X chromosome from selection scans for**  
 65 **northern and southern *M. m. domesticus*.**

|                     | Unique regions<br>northern transect | Unique regions<br>southern transect | Overlap | Expected<br>overlap | P-value | Z-score |
|---------------------|-------------------------------------|-------------------------------------|---------|---------------------|---------|---------|
| <b>LFMM q=0.05</b>  | 13                                  | 97                                  | 2       | 2.59                | 0.77    | -0.42   |
| <b>PBSn1 top 1%</b> | 9                                   | 14                                  | 0       | 0.30                | 1       | -0.57   |

66 <sup>a</sup>. Restricted to genomic regions sampled on both transects.

67 **TABLE S10. Permutation tests<sup>a</sup> for overlap SNPs on X chromosome from selection scans for northern and**  
 68 **southern *M. m. domesticus*.**

|                     | Unique regions<br>northern transect | Unique regions<br>southern transect | Overlap | Expected<br>overlap | P-value | Z-score |
|---------------------|-------------------------------------|-------------------------------------|---------|---------------------|---------|---------|
| <b>LFMM q=0.05</b>  | 13                                  | 100                                 | 0       | 2.56                | 1       | -1.71   |
| <b>PBSn1 top 1%</b> | 10                                  | 14                                  | 0       | 0.31                | 1       | -0.56   |

69 <sup>a</sup>. Restricted to genomic regions sampled on both transects.

## 70 Supplemental Figures.

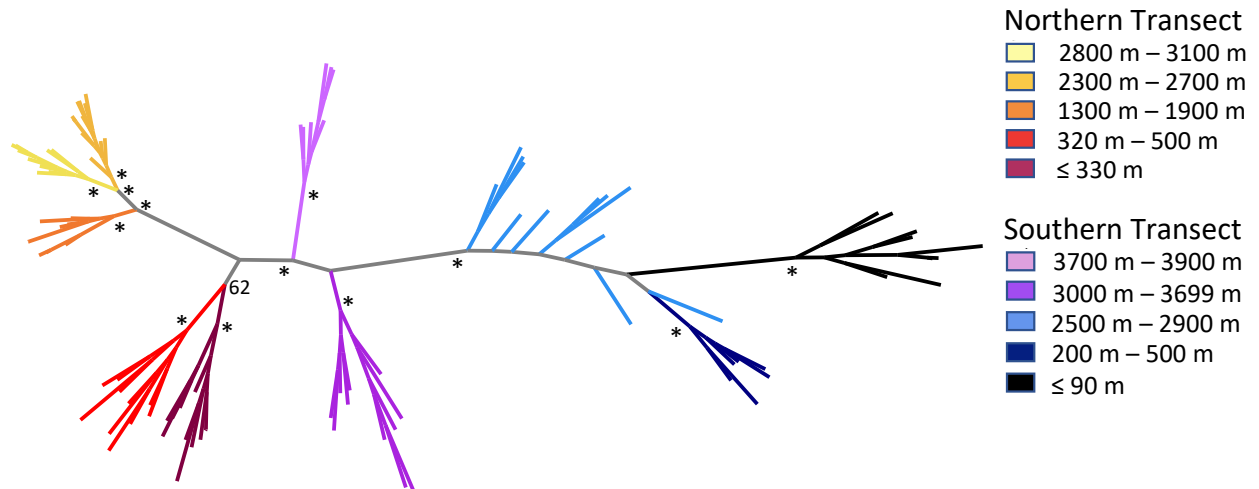

**Figure S1. Unrooted maximum likelihood tree of South American *M. m. domesticus*.** Phylogeny was estimated with 96 individuals and 63,513 SNPs pruned for linkage disequilibrium. Bootstrap support indicated at key nodes; \* indicates bootstrap support of  $\geq 96$ .

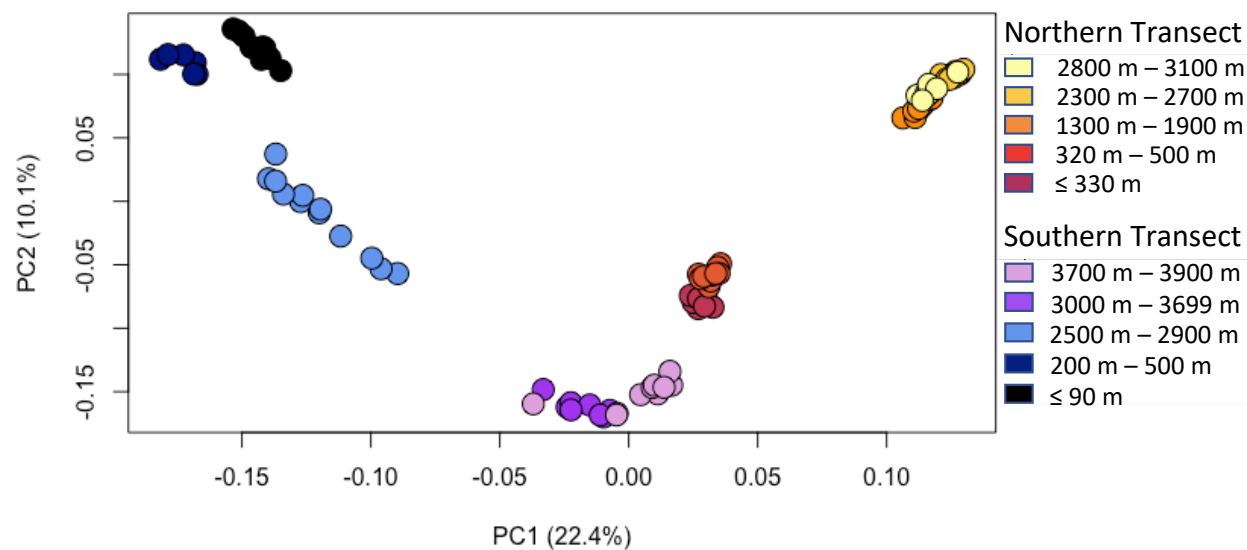

**Figure S2. Principal component analysis of northern and southern transects individuals.** Principal component analysis was conducted with 380,272 SNPs and 96 house mice. Samples are colored by elevation and transect; see legend on right.

73  
74

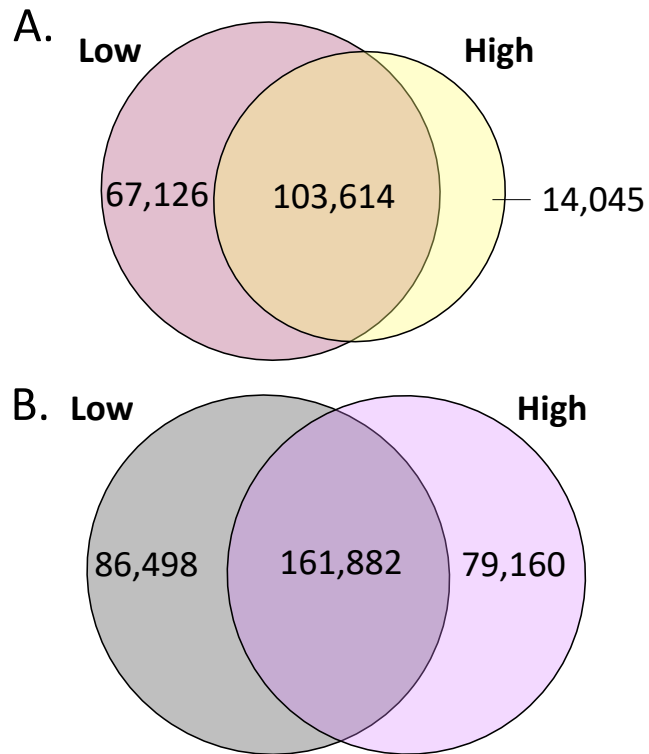

**Figure S3. Shared and unique variable sites for high and low populations. A. northern transect. B. southern transect.** Sites in overlap were variable in both high and low populations.



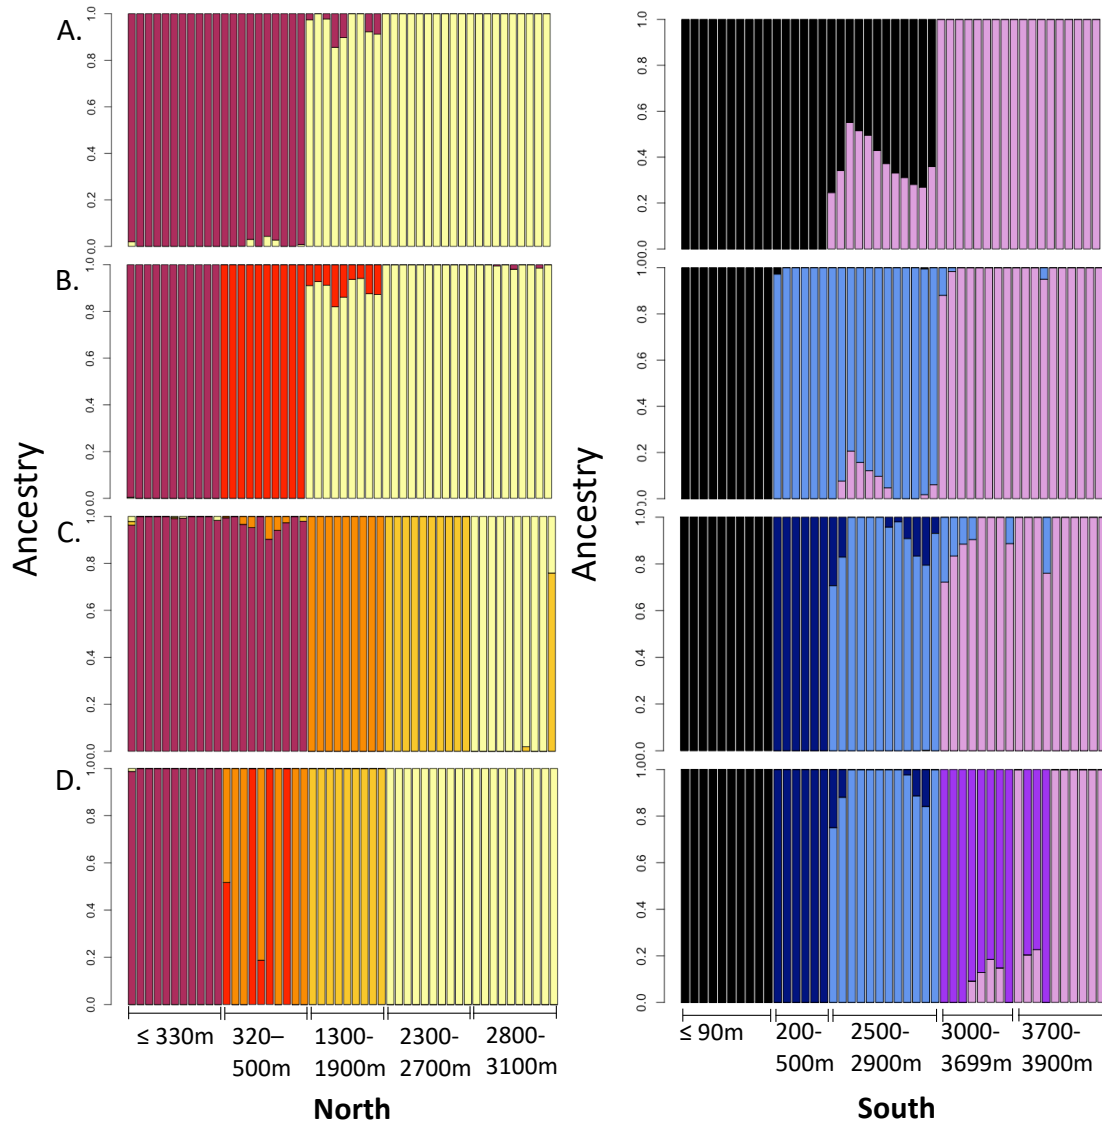

**Figure S4. Admixture analyses *M. m. domesticus*.** Individuals from northern (left) and southern (right) transects at **A.** K =2, **B.** K=3, **C.** K=4, and **D.** K=5; elevation of capture indicated at bottom of graphs. Colors ordered by elevation, as in Fig. 2.

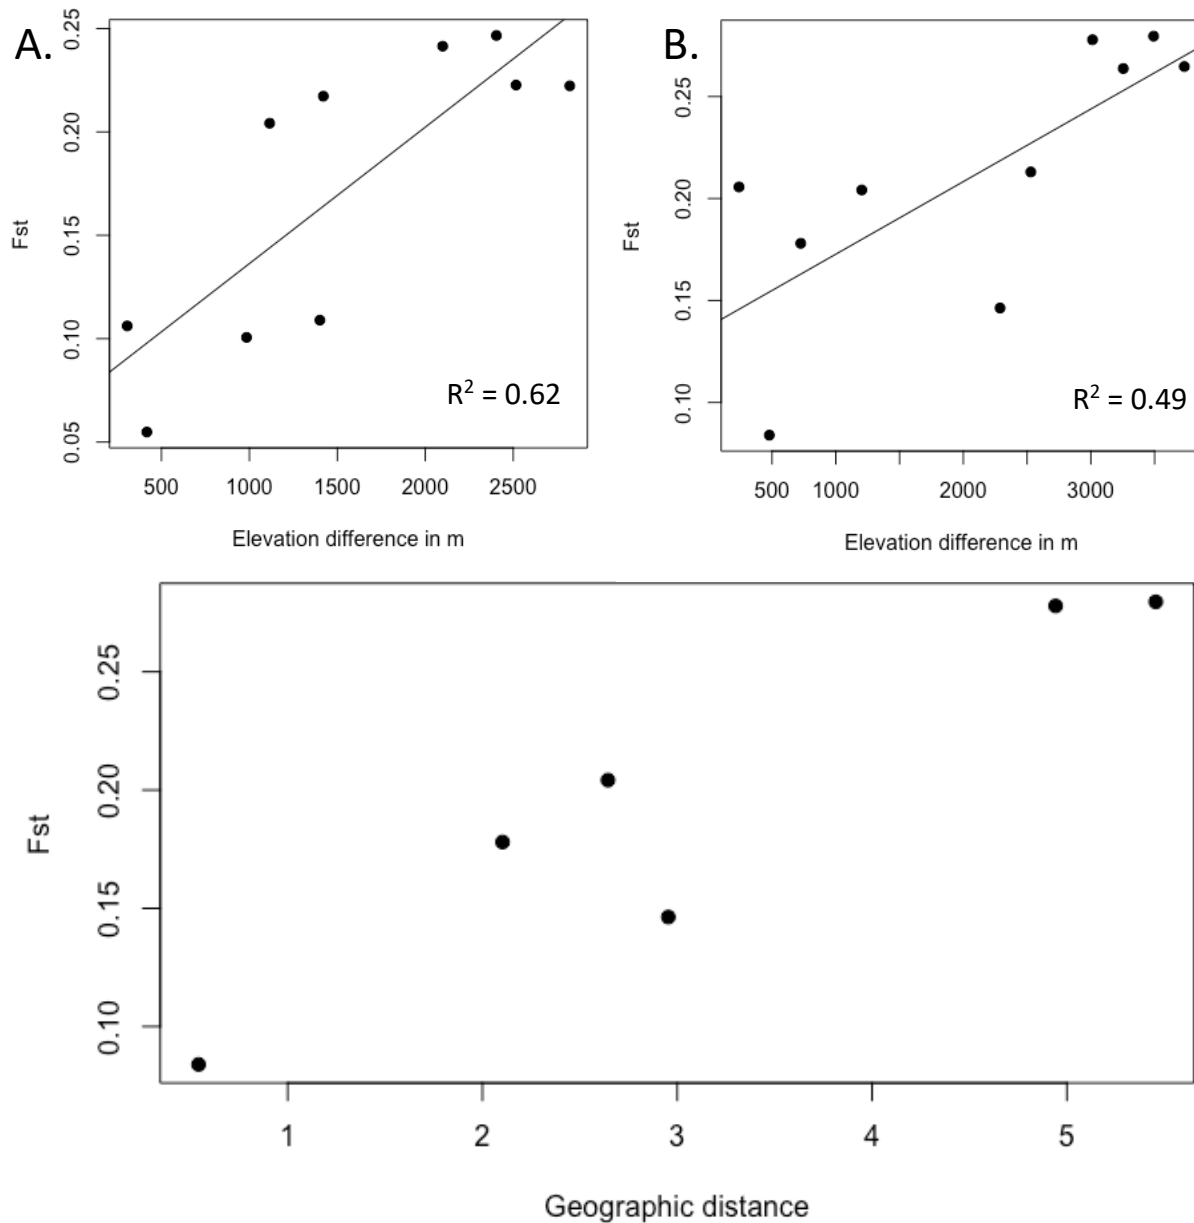

**Figure S5. *M. m. domesticus* pairwise genetic differentiation ( $F_{ST}$ ) across space.** (A) Pairwise  $F_{ST}$  by difference in elevation (m) for the northern transect. (B) Pairwise  $F_{ST}$  by difference in elevation (m) for the southern transect. (C) Pairwise  $F_{ST}$  by geographic distance in degrees, only including *M. m. domesticus* populations on the southern transect that were at or above 300 m.

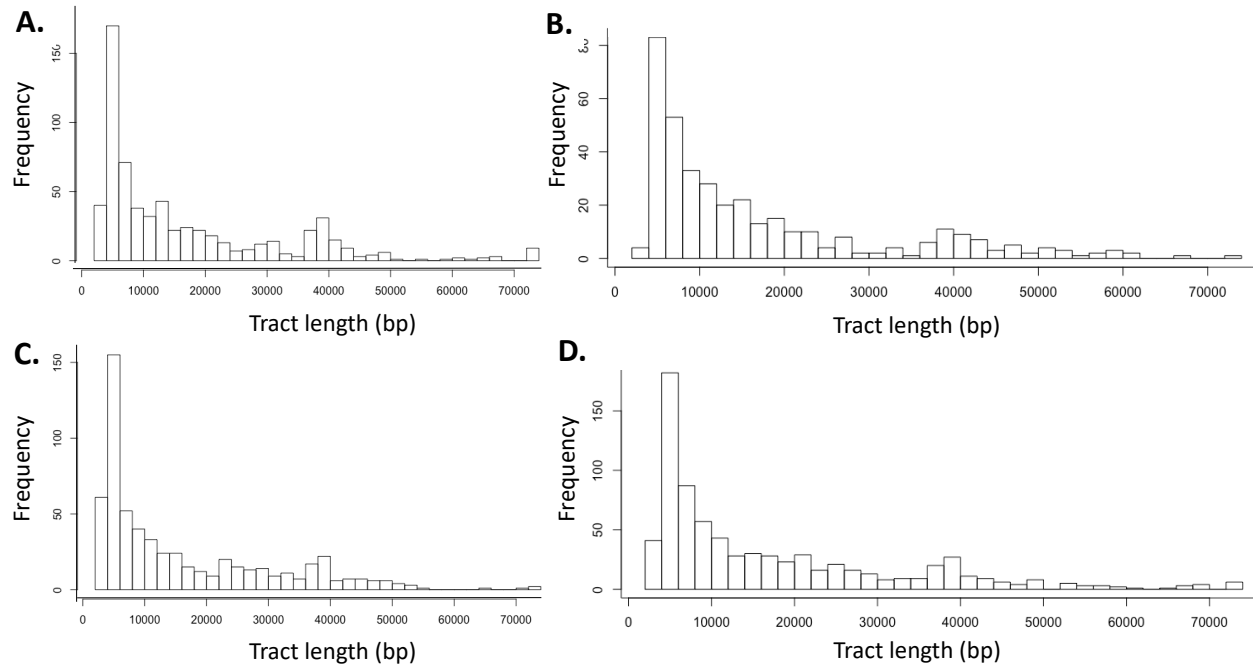

**Figure S6. Tract length of consecutive significant SNPs in *M. m. domesticus* selection scans.** Histograms of tract lengths shown for **A.** LFMM analysis,  $q=0.05$  in northern transect. **B.** LFMM analysis in southern transect. **C.** PBSn1, top 1%, in northern transect. **D.** PBSn1 in southern transect.

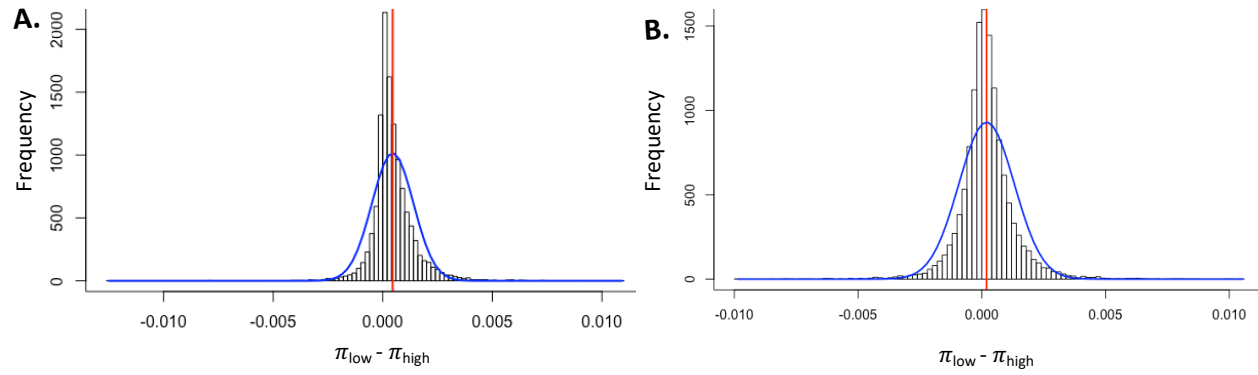

**Figure S7. Distribution of the difference in nucleotide diversity ( $\pi$ ) between high and low populations.** Nucleotide diversity difference was calculated in 100 kb non-overlapping windows. The mean of each distribution is shown in red, and the expected normal curve is represented in blue. **A.** northern transect. **B.** southern transect.

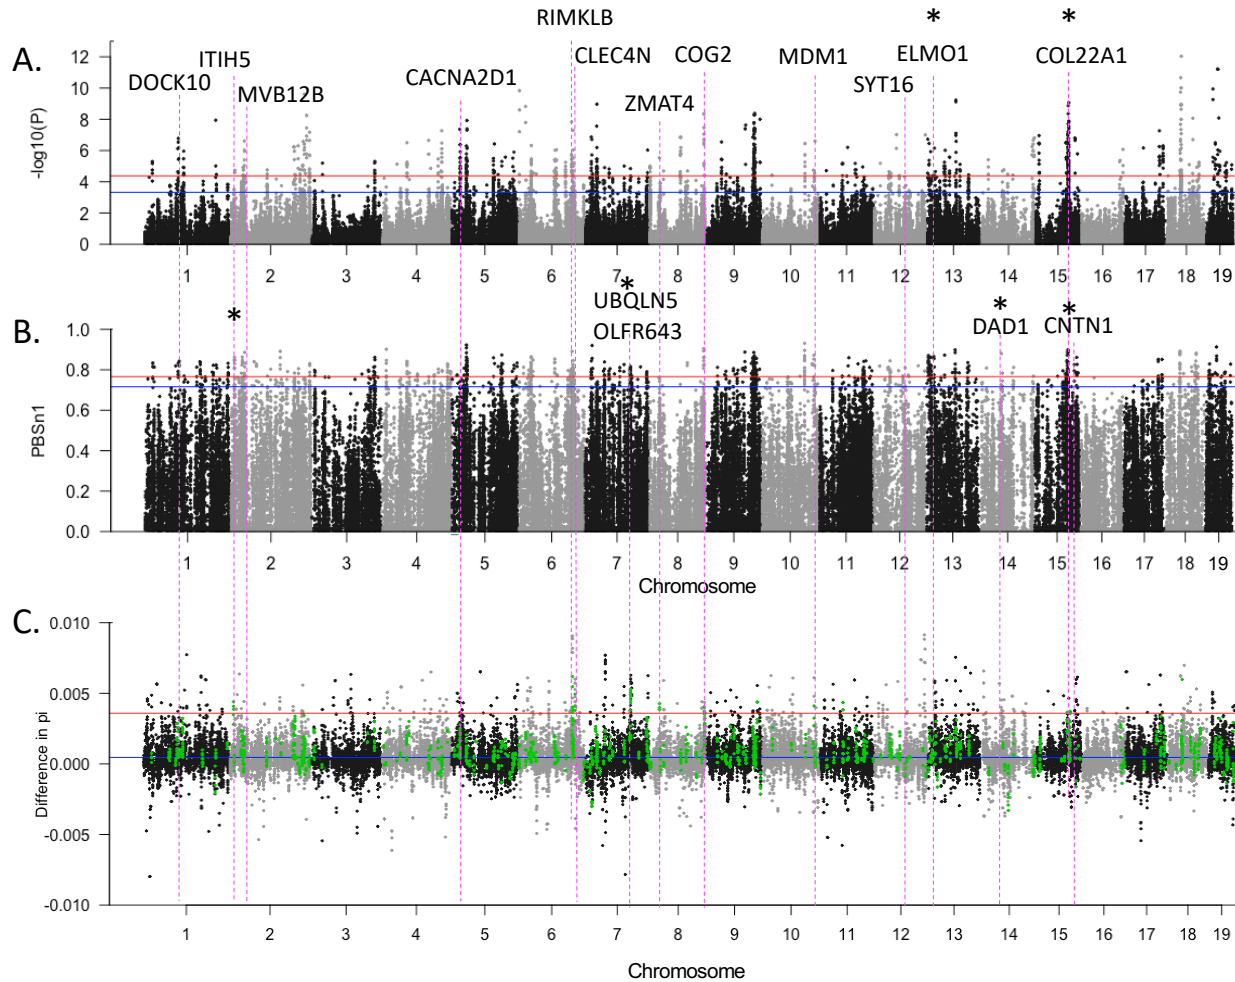

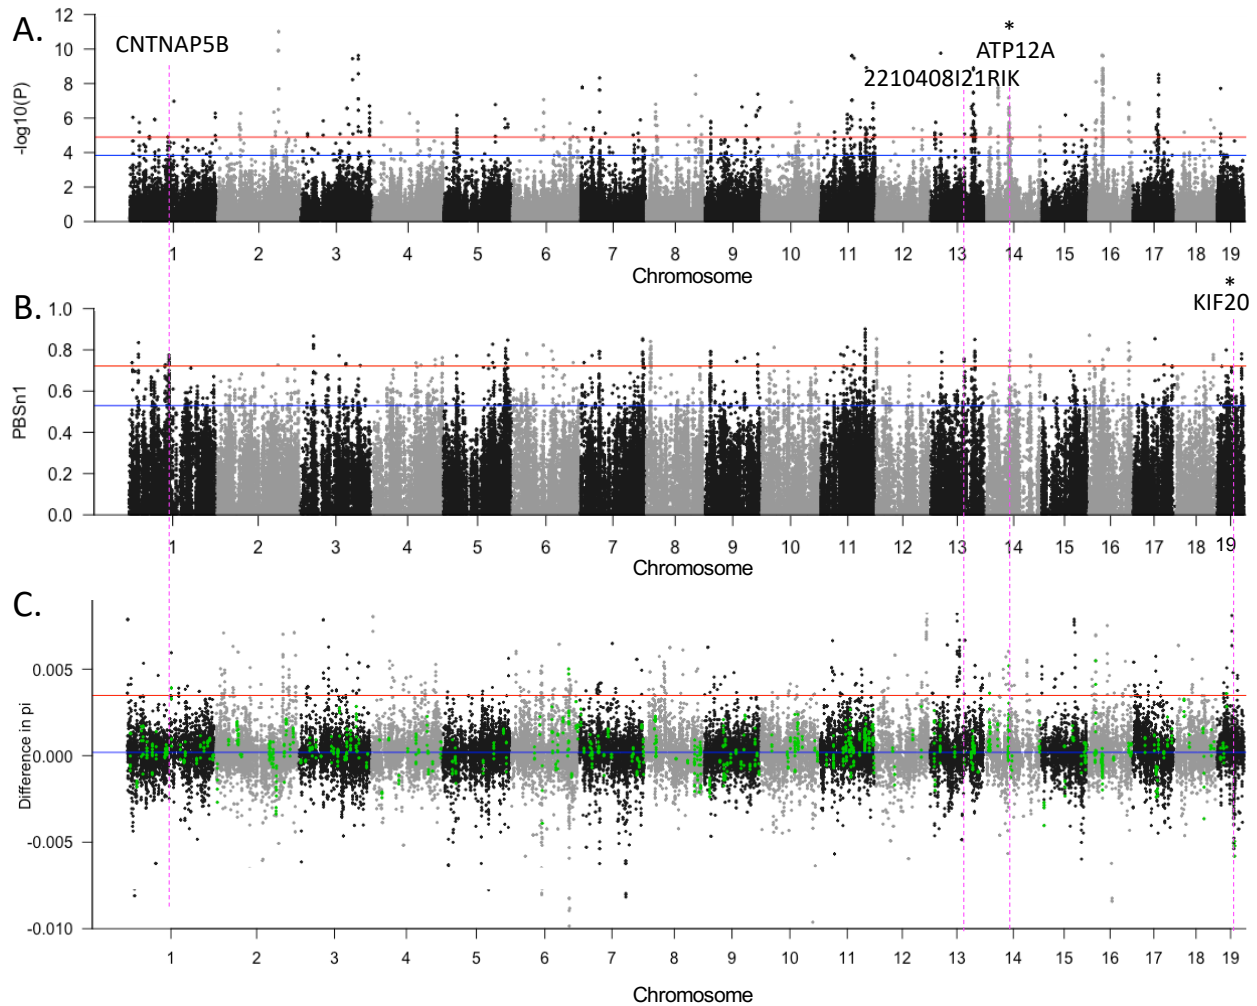

**Figure S9. Southern transect *M. m. domesticus* autosomal selection scan results and nucleotide diversity.** **A.** LFMM results with elevation ( $n=45$ ; 351,786 SNPs) with  $q=0.05$  indicated in blue and  $q=0.01$  in red. **B.** PBSn1 results ( $n=45$ ; 176,993 SNPs) with top 1 (blue) and 0.1 (red) percent thresholds shown. **C.** Difference in nucleotide diversity ( $\pi$ ) between populations  $< 90$  m and  $> 3700$  m in sliding 100 kb windows with 25 kb step. SNPs that were significant in LFMM analysis with  $q=0.05$  highlighted in green. Purple dashed lines show genes shared in all analyses (3); genes in top 1 percent of values in C that also show an exceptional stretch of significant SNPs in A and B (1, panel A) or just B (1, panel B) are indicated with \*.

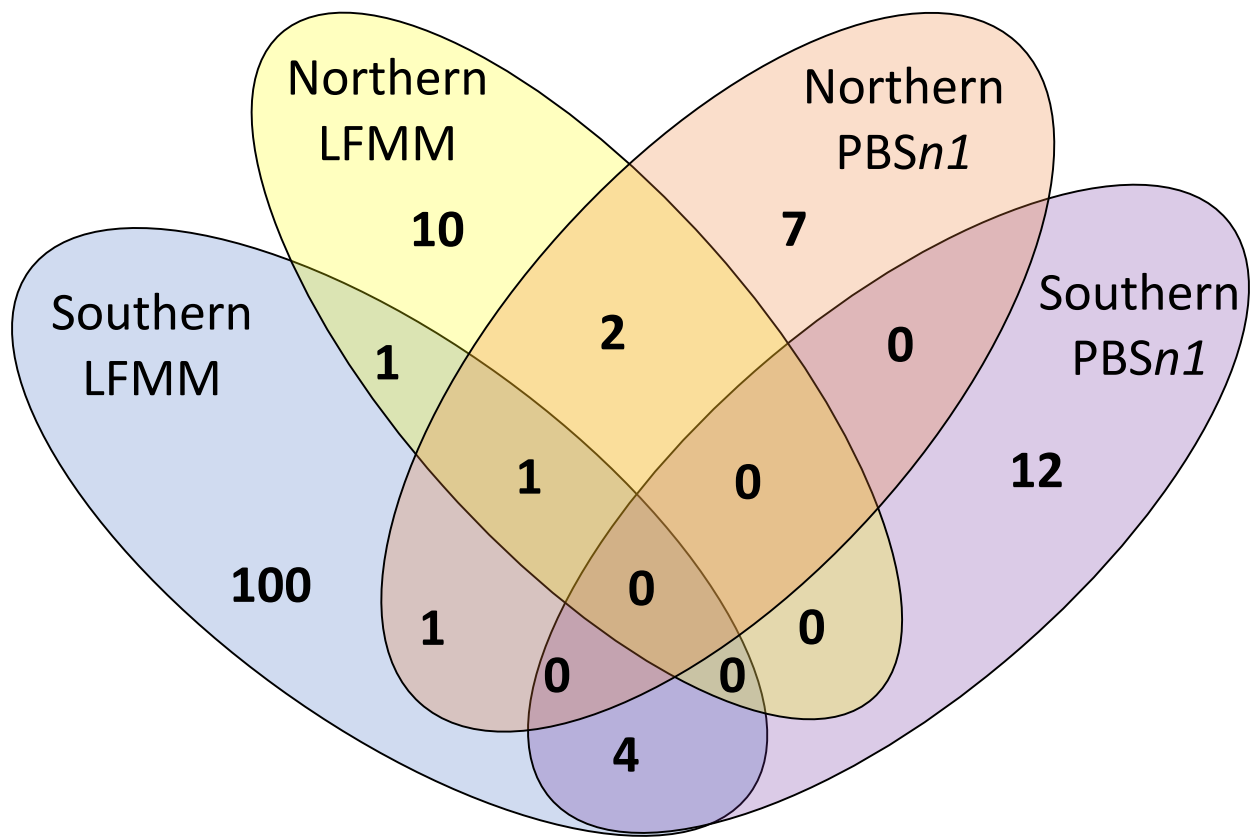

**Figure S10. Transect gene overlap of selection scan candidates on X chromosome.**  
Selection scans with latent factor mixed modeling with  $q=0.05$  and top 1 percent of *PBSn1* candidates.
